# Supplementary material for: Development of a fast and efficient root transgenic system for functional genomics and genetic engineering in peach
Source: PubMed Central journal article supplement (PMC7029003; doi:10.1038/s41598-020-59626-8), 2020-02-18
Supplement: 41598_2020_59626_MOESM1_ESM.pdf [file 41598_2020_59626_MOESM1_ESM.pdf]

## **Supplementary Information**

### **Development of a fast and efficient root transgenic system for functional genomics and genetic engineering in peach**

Shengli Xu<sup>1,2¶</sup>, Enhui Lai<sup>1,2¶</sup>, Lei Zhao<sup>1,2</sup>, Yaming Cai<sup>1,2</sup>, Collins Ogutu<sup>1,2</sup>, Sylvia Cheron<sup>1,2</sup>,  
Yuepeng Han<sup>1,3\*</sup>, Beibei Zheng<sup>1\*</sup>

## **Table of contents**

Table S1 List of primers used in this study

Figure S1 Expression levels of genes involved in anthocyanin synthesis in transgenic and wild type roots.

Figure S2 The full-length gels for cropped gels used in Figure 2 (a-c), 3 (d) and 5 (e-g).

**Table S1 List of primers used in this study**

| gene                     | Primers (5'-3')       |                        |
|--------------------------|-----------------------|------------------------|
|                          | Forward               | Reverse                |
| <i>PpMYB10.1</i>         | GAAATGATTGGTGGGAAACC  | GTCCTTCTTCTGAAACATTGGT |
| <i>PpGST</i>             | ACTTCAACTTCTGGTGCTGC  | GCTGCTCTTTGATAATCTTTCC |
| <i>PpUFGT</i>            | GTCCTAGCCCATGCTTCAGTC | GATCTCCAACACGTCCTCCAC  |
| <i>PpGAPDH</i>           | TGCCATTGAAATCCTGAAAC  | ACCAATTGGATCATCCTCCT   |
| <i>PpCHS</i>             | AACAAGGGTGCTCGTGTTCTC | GCTGCACCATCACCGAATAAG  |
| <i>PpCHI</i>             | GAGATCGTTACAGGTCCATTG | GTGGGAAGTTTTGATCCTTGA  |
| <i>PpF3H</i>             | GGACTGGACACAGAGGCATT  | AATTGTGCCTGGGTCAGTGT   |
| <i>PpF3'H</i>            | CTCTCGCTCAAAGAGGATGC  | CCATTCCACTGTGCTTGATG   |
| <i>PpDFR</i>             | CGCCTCCAAGACTCTAGCTG  | CCAGTGAGTGGGGAAAGTCC   |
| <i>PpLDOX</i>            | AGGAGTTGAAGAAGGCAGCA  | GCCTGGTCATTGGCATACTT   |
| <i>DsRED1</i>            | CCCAGTTCCAGTACGGCTC   | ATGGTGTAGTCCTCGTTTGTG  |
| <i>PpMYB10.1-PSAK277</i> | ACGCACAATCCCACTATCCT  | TCATGCGATCATAGGCGTCT   |
| <i>rolB</i>              | GCTCTTGCAGTGCTAGATTT  | GAAGGTGCAAGCTACCTCTC   |
| <i>VirD</i>              | ATGTCGCAAGGCAGTAAG    | CAAGGAGTCTTTCAGCATG    |

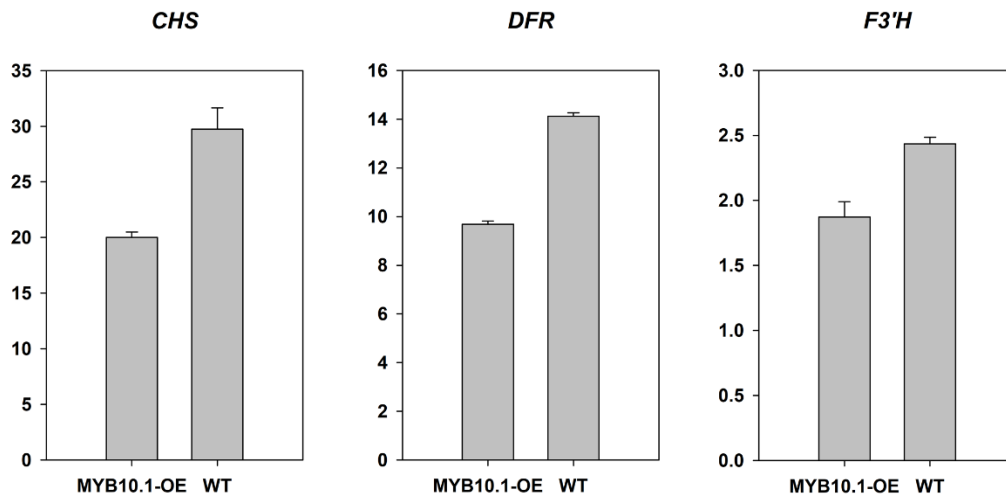

Figure S1 Expression levels of genes involved in anthocyanin synthesis in transgenic and wild type roots.

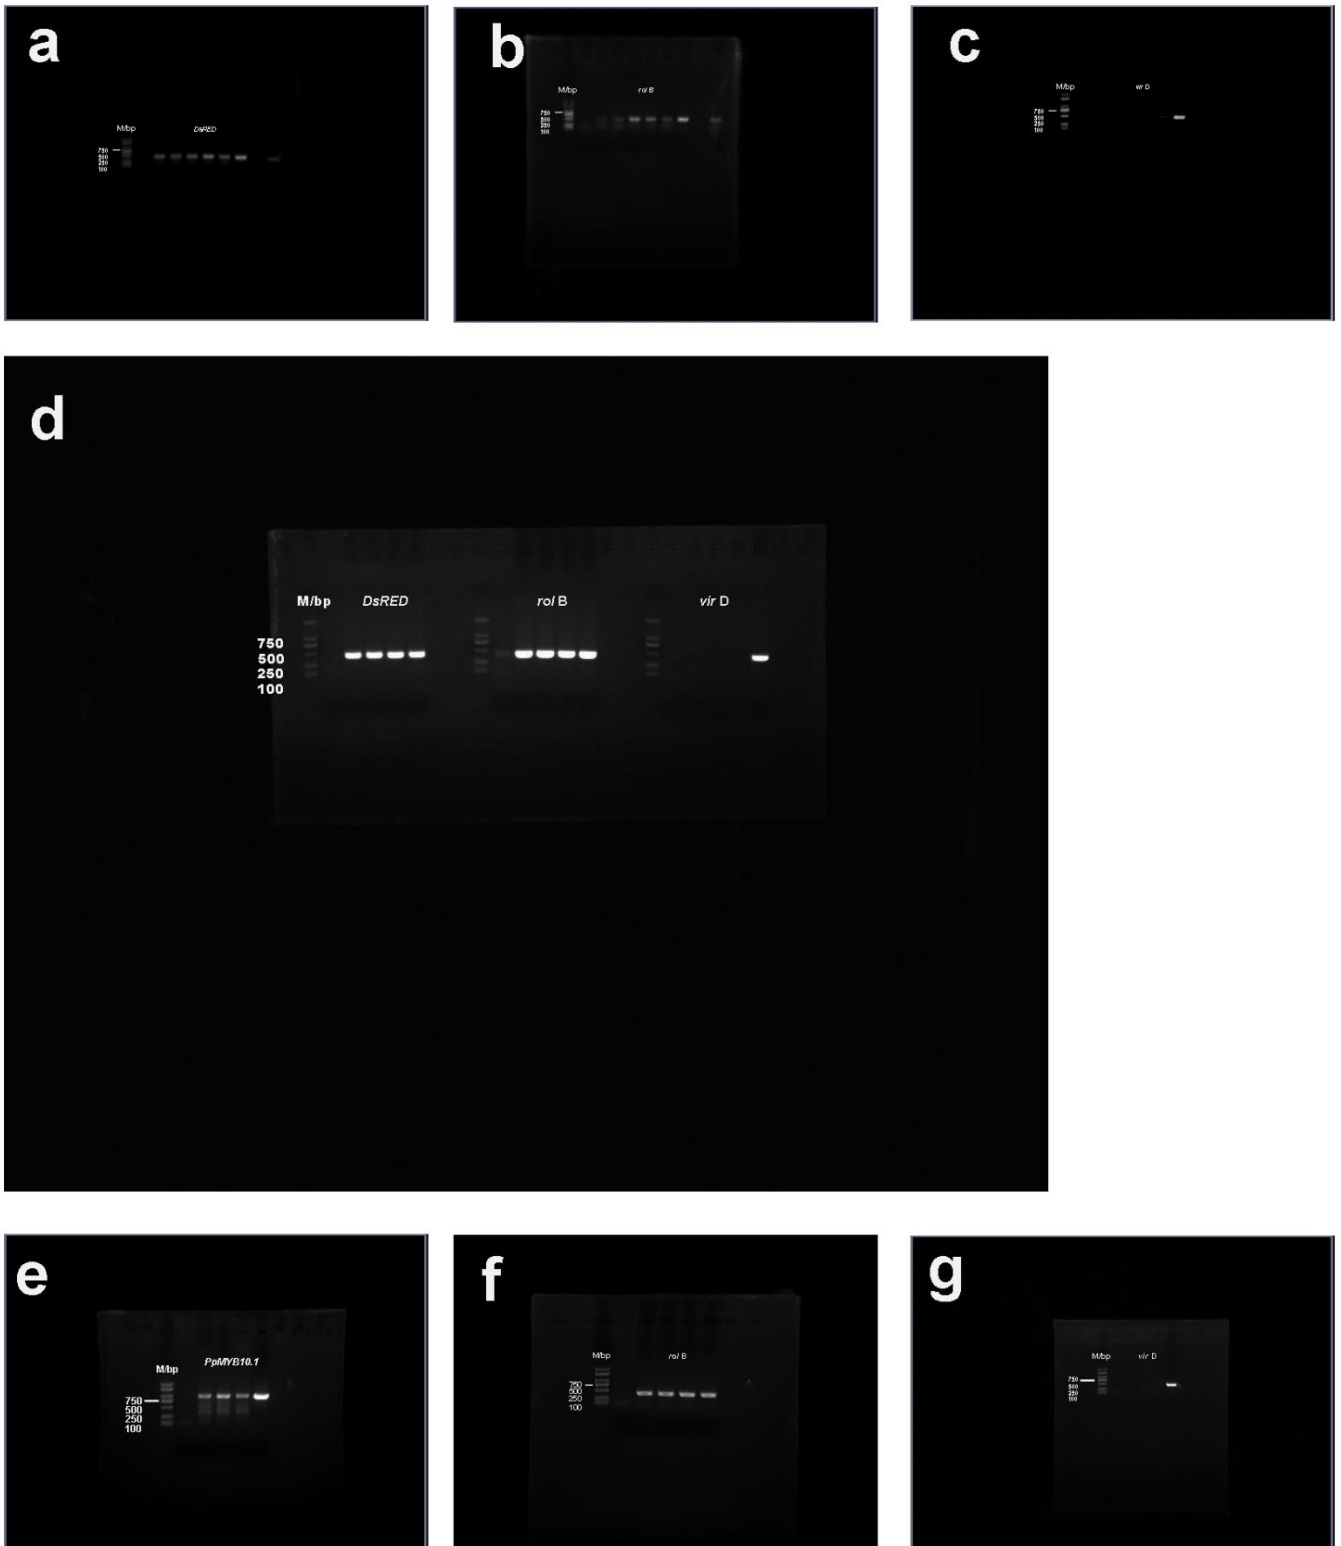

Figure S2 The full-length gels for cropped gels used in Figure 2 (a-c), 3 (d) and 5 (e-g).
